# Supplementary material for: Economic Grand Rounds: Experience With Mandated Use of Generic Medications for Patients Covered by the Mental Health Safety Net
Source: Atypon-hosted journal article supplement (doi:10.1176/appi.ps.201400075), 2014-07-01
Supplement: 850_ds001.pdf [file 850_ds001.pdf]

**Table: Pharmacy expenditures and outcomes by implementation periods, means and standard deviations**

|                                                                                               | <b>Pre-<br/>implementation</b> | <b>Implementation</b>          | <b>Post-implementation</b>   | <b>Follow-up</b>               |
|-----------------------------------------------------------------------------------------------|--------------------------------|--------------------------------|------------------------------|--------------------------------|
|                                                                                               | <b>Nov 2010 – May<br/>2011</b> | <b>Aug 2011 – Oct<br/>2011</b> | <b>Nov 2011 – April 2012</b> | <b>May 2012 – May<br/>2013</b> |
| <i>Pharmacy</i>                                                                               |                                |                                |                              |                                |
| Total expenditures on medications per month                                                   | \$246,801<br>(18746)           | \$119,224<br>(31744)           | \$60,111<br>(6217)           | \$95,378<br>(12509)            |
| Cost per prescription per month                                                               | \$97.38<br>(5.95)              | \$52.66<br>(10.48)             | \$21.81<br>(0.55)            | \$22.90<br>(1.38)              |
| Percentage of expenditures on brand name medications per month <sup>1</sup>                   | 74%                            | 57%                            | 9%                           | 6%                             |
| Number of prescriptions filled per month                                                      | 2,544<br>(26)                  | 2,245<br>(140)                 | 2,759<br>(309)               | 4,168<br>(464)                 |
| Number of members filling prescriptions per month                                             | 1,014<br>(64)                  | 962<br>(21)                    | 1,152<br>(103)               | 1,678<br>(166)                 |
| Cost of nonpsychiatric medications per month                                                  | \$608.50<br>(276.50)           | \$69<br>(0)                    | \$114<br>(0)                 | \$84.5<br>(29.50)              |
| <i>Outcomes</i>                                                                               |                                |                                |                              |                                |
| Number of prescription per member with prescriptions in same month per month                  | 2.51<br>(.20)                  | 2.33<br>(.12)                  | 2.39<br>(.08)                | 2.48<br>(.09)                  |
| Psychiatric hospitalization admission per month, all members <sup>1</sup>                     | 260.3                          | 263.1                          | 231.2                        | 250.7                          |
| Psychiatric hospitalization admission per month, members not covered by Medicaid <sup>1</sup> | 54.6                           | 76.5                           | 65.5                         | 64.3                           |

Pre-implementation covered months prior to discussion with clinicians

Implementation covered months of mandated generic use resulting in full implementation

Post-implementation covered months following full implementation

Follow-up covered months following post-implementation

Standard deviations are in parentheses.

<sup>1</sup> Data collected for range of dates and standardized to 30 day months.
